# Supplementary material
Source: PubMed Central journal article supplement (PMC515101)
Supplement: pnas_101_34_12588__1.pdf [file pnas_101_34_12588__1.pdf]

**Table 2. A comparison of codon usage between two human genes**

| Codon                    | Gene A, <i>n</i> (%) | Gene B, <i>n</i> (%) | Codon                    | Gene A, <i>n</i> (%) | Gene B, <i>n</i> (%) |
|--------------------------|----------------------|----------------------|--------------------------|----------------------|----------------------|
| gcc                      | 9 (20)               | 19 (58)              | aac                      | 8 (38)               | 5 (83)               |
| gcg                      | 3 (7)                | 8 (24)               | aat                      | 13 (62)              | 1 (17)               |
| gca                      | 17 (38)              | 3 (9)                | Asn, <i>P</i> = 0.076812 |                      |                      |
| gct                      | 16 (36)              | 3 (9)                | ccc                      | 3 (12)               | 16 (53)              |
| Ala, <i>P</i> = 0.000024 |                      |                      | ccg                      | 1 (4)                | 9 (30)               |
| tgc                      | 2 (12)               | 5 (50)               | cca                      | 13 (54)              | 4 (13)               |
| tgt                      | 14 (88)              | 5 (50)               | cct                      | 7 (29)               | 1 (3)                |
| Cys, <i>P</i> = 0.068653 |                      |                      | Pro, <i>P</i> = 0.000009 |                      |                      |
| gac                      | 10 (53)              | 13 (93)              | cag                      | 12 (60%)             | 23 (96)              |
| gat                      | 9 (47)               | 1 (7)                | caa                      | 8 (40%)              | 1 (4)                |
| Asp, <i>P</i> = 0.020940 |                      |                      | Gln, <i>P</i> = 0.006346 |                      |                      |
| gag                      | 13 (34)              | 22 (92)              | cgc                      | 1 (5)                | 8 (26)               |
| gaa                      | 25 (66)              | 2 (8)                | cgg                      | 0 (0)                | 7 (23)               |
| Glu, <i>P</i> = 0.000006 |                      |                      | cga                      | 3 (14)               | 2 (6)                |
| ttc                      | 8 (35)               | 9 (82)               | cgt                      | 5 (24)               | 0 (0)                |
| ttt                      | 15 (65)              | 2 (18)               | agg                      | 3 (14)               | 14 (45)              |
| Phe, <i>P</i> = 0.025510 |                      |                      | aga                      | 9 (43)               | 0 (0)                |
| ggc                      | 8 (17)               | 13 (52)              | Arg, <i>P</i> = 0.000000 |                      |                      |
| ggg                      | 6 (13)               | 9 (36)               | agc                      | 5 (14)               | 11 (46)              |
| gga                      | 21 (45)              | 3 (12)               | agt                      | 12 (32)              | 0 (0)                |
| ggt                      | 12 (26)              | 0 (0)                | tcc                      | 2 (5)                | 7 (29)               |
| Gly, <i>P</i> = 0.000018 |                      |                      | tcg                      | 1 (3)                | 6 (25)               |
| cac                      | 1 (12)               | 7 (70)               | tca                      | 6 (16)               | 0 (0)                |
| cat                      | 7 (88)               | 3 (30)               | tct                      | 11 (30)              | 0 (0)                |
| His, <i>P</i> = 0.024818 |                      |                      | Ser, <i>P</i> = 0.000000 |                      |                      |
| atc                      | 7 (22)               | 6 (86)               | acc                      | 11 (31)              | 9 (82)               |
| ata                      | 9 (28)               | 0 (0)                | acg                      | 2 (6)                | 0 (0)                |
| att                      | 16 (50)              | 1 (14)               | aca                      | 14 (39)              | 1 (9)                |
| Ile, <i>P</i> = 0.008006 |                      |                      | act                      | 9 (25)               | 1 (9)                |
| aag                      | 8 (30)               | 9 (100)              | Thr, <i>P</i> = 0.036607 |                      |                      |
| aaa                      | 19 (70)              | 0 (0)                | gtc                      | 7 (16)               | 8 (27)               |
| Lys, <i>P</i> = 0.000258 |                      |                      | gtg                      | 13 (30)              | 18 (60)              |
| ctc                      | 6 (11)               | 10 (21)              | gta                      | 11 (26)              | 3 (10)               |
| ctg                      | 6 (11)               | 37 (77)              | gtt                      | 12 (28)              | 1 (3)                |
| cta                      | 8 (15)               | 0 (0)                | Val, <i>P</i> = 0.003838 |                      |                      |
| ctt                      | 20 (36)              | 1 (2)                | tac                      | 5 (36)               | 2 (50)               |
| ttg                      | 9 (16)               | 0 (0)                | tat                      | 9 (64)               | 2 (50)               |
| tta                      | 6 (11)               | 0 (0)                | Tyr, <i>P</i> = 1.000000 |                      |                      |
| Leu, <i>P</i> = 0.000000 |                      |                      |                          |                      |                      |

For each codon, we report the absolute frequency in each gene and the relative frequency compared to synonymous codons. The *P* value for each amino acid is calculated by using a  $n \times 2$  Fisher exact test on the frequencies of synonymous codons. There are 11 amino acids with significantly different encodings ( $P < 0.01$ ) between these two genes. Gene A, testes-specific glycerol kinase (GI:516123, 554 residues); gene B, endometrial bleeding factor (gene B, GI:2058537, 371 residues).
